# Supplementary material for: Synthesis of a porous SiO2–H3BO3–V2O5–P2O5 glassy composite: structural and surface morphological behaviour for CO2 gas sensing applications
Source: Royal Society of Chemistry journal article supplement (doi:10.1039/d2ra04455b), 2022-01-01
Supplement: d2ra04455b1.pdf [file d2ra04455b1.pdf]

## Electronic Supplementary Information

### Synthesis of a porous $\text{SiO}_2\text{-H}_3\text{BO}_3\text{-V}_2\text{O}_5\text{-P}_2\text{O}_5$ glassy composite: Structural and Surface Morphological Behaviour for $\text{CO}_2$ Gas Sensing Applications

Zaireen Fatima<sup>1,2</sup>, Chandkiram Gautam<sup>\*1</sup>, Ajeet Singh<sup>3</sup>, Sarvesh Kumar Avinashi<sup>1</sup>, Bal Chandra Yadav<sup>3</sup>, Afroj Ahmed Khan<sup>2</sup>

<sup>1</sup>Advanced Glass and Glass Ceramics Research Laboratory, Department of Physics, University of Lucknow, Lucknow-226007 (India)

<sup>2</sup>Department of Physics, Integral University, Lucknow-226026 (India)

<sup>3</sup>Department of Physics, Babasaheb Bhimrao Ambedkar University, Lucknow-226025 (India)

\*E-mail: gautam\_ceramic@yahoo.com

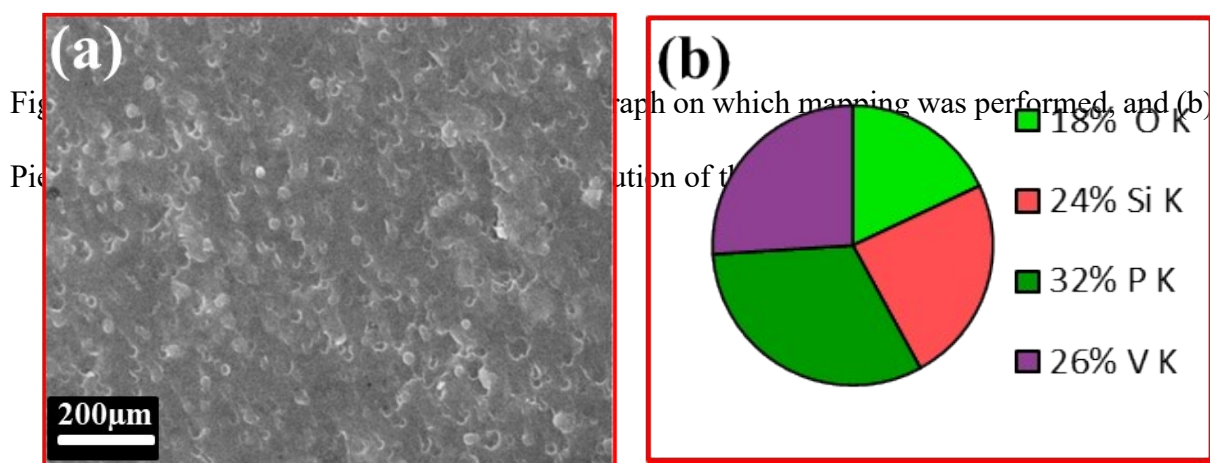

Table S1: Elements and their weight percentage of the synthesized glass sample.

| Element | Weight % |
|---------|----------|
| O K     | 41.96    |
| Al K    | 0.73     |
| Si K    | 9.04     |

---

|     |       |
|-----|-------|
| P K | 15.71 |
| V K | 32.56 |

---

Table S2. Response time, recovery time and sensing response of thin film SHVP6 porous glass at 200, 400, 600, 800 and 1000 ppm of CO<sub>2</sub>.

| CO <sub>2</sub><br>(ppm) | Response<br>time<br>(sec) | Recovery<br>time<br>(sec) | Sensing<br>Response<br>(sec) |
|--------------------------|---------------------------|---------------------------|------------------------------|
| 200                      | 12.2                      | 15.3                      | 1.83                         |
| 400                      | 14.4                      | 19.08                     | 2.07                         |
| 600                      | 16.3                      | 21.6                      | 2.34                         |
| 800                      | 20.2                      | 24.3                      | 2.65                         |
| 1000                     | 22.6                      | 25.8                      | 3.05                         |
